# Supplementary material for: Effects of intravenous iron on fibroblast growth factor 23 (FGF23) in haemodialysis patients: a randomized controlled trial
Source: PubMed Central journal article supplement (PMC5112660; doi:10.1186/s12882-016-0391-7), 2016-11-16

## Supplementary Figure

**Figure S1.** The individual participant levels of iFGF23 (pg/mL), cFGF23 (RU/mL) and phosphate (mmol/L) over the course of the study for participants randomized to iron sucrose (left panels) and ferric carboxymaltose (right panels).

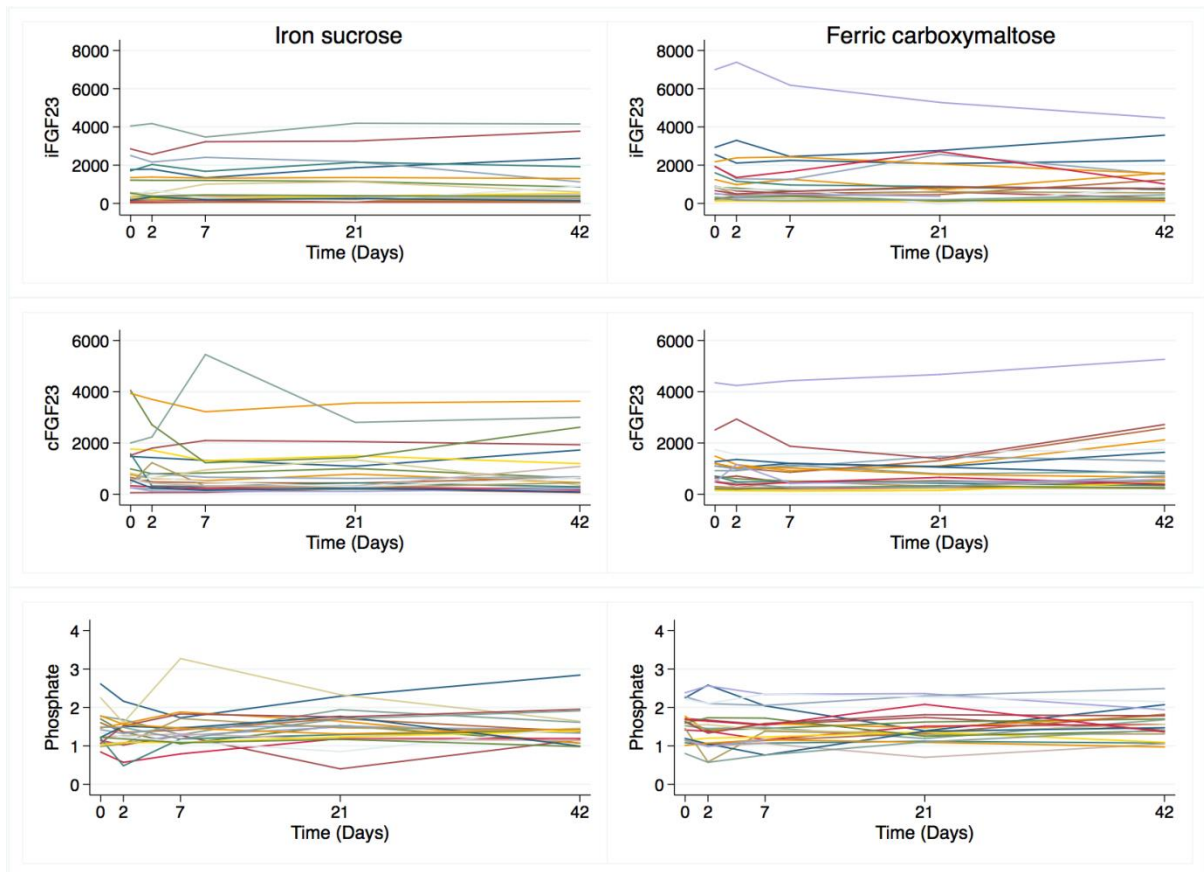

**Figure S2.** The individual participant levels of serum hepcidin (ng/mL) ferritin ( $\mu\text{g/L}$ ), and haemoglobin (g/L) over the course of the study for participants randomized to iron sucrose (left panels) or ferric carboxymaltose (right panels).

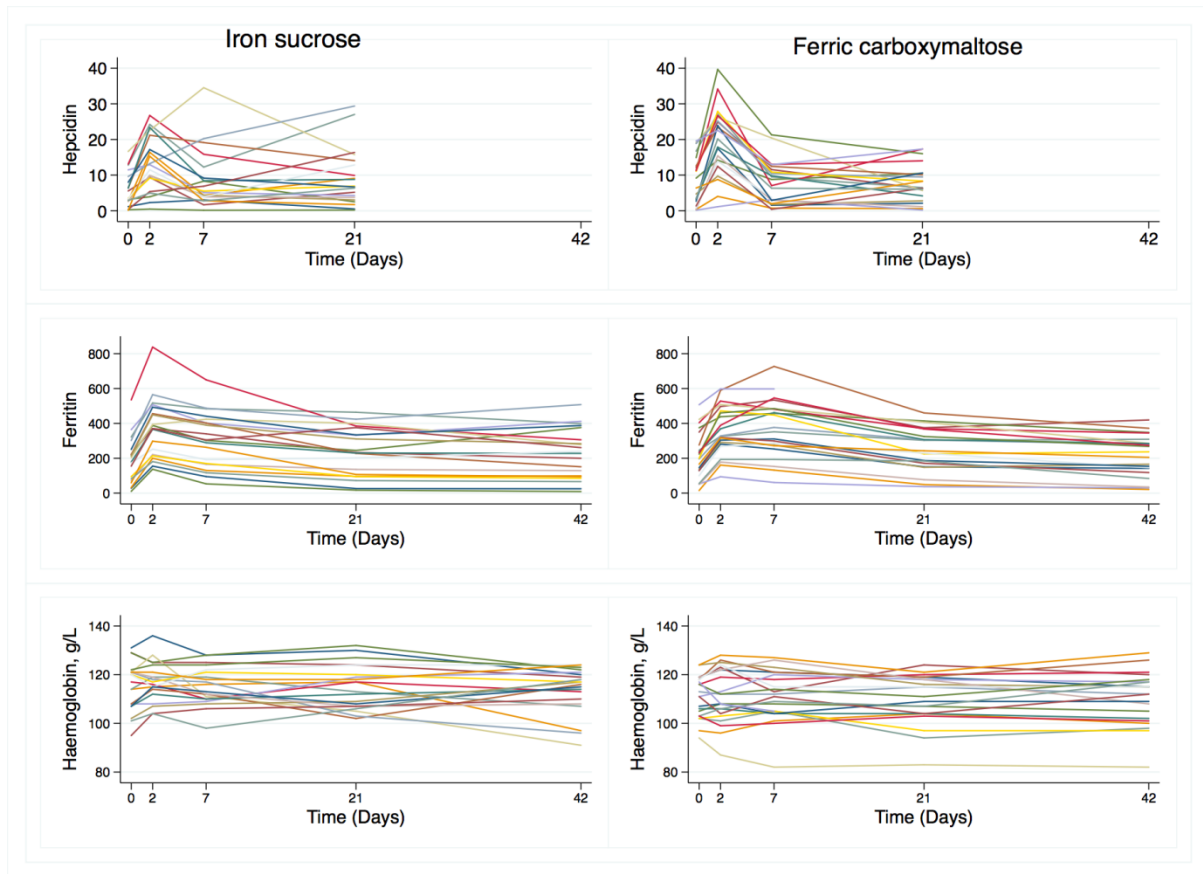

Supplement: 12882_2016_391_MOESM1_ESM.pdf [file 12882_2016_391_MOESM1_ESM.pdf]
