# Supplementary material for: Effects of intravenous iron on fibroblast growth factor 23 (FGF23) in haemodialysis patients: a randomized controlled trial
Source: PubMed Central journal article supplement (PMC5112660; doi:10.1186/s12882-016-0391-7), 2016-11-16
Supplement: 12882_2016_391_MOESM2_ESM.pdf [file 12882_2016_391_MOESM2_ESM.pdf]

## Supplementary Table

**Table S1.** Median (IQR) levels of iFGF23, cFGF23, ratio of cFGF23 to iFGF23, hepcidin and phosphate at Day 0, 2, 7, 21 and Day 42, by randomized treatment group. P values for comparison assess whether median values differ across the whole time period and are adjusted for multiple comparisons. Unless indicated, P values for pair-wise comparison of specific time points, adjusted for multiple comparisons, were not significant.

|                  | Iron sucrose            |                                     |                                 |                                 |                         |       | FCM                     |                                      |                                   |                                 |                                     |        |
|------------------|-------------------------|-------------------------------------|---------------------------------|---------------------------------|-------------------------|-------|-------------------------|--------------------------------------|-----------------------------------|---------------------------------|-------------------------------------|--------|
|                  | Day 0                   | Day 2                               | Day 7                           | Day 21                          | Day 42                  | P     | Day 0                   | Day 2                                | Day 7                             | Day 21                          | Day 42                              | P      |
| <b>iFGF23</b>    | 381<br>(245-<br>1,526)  | 378<br>(235-<br>1,584)              | 392<br>(228-<br>1,330)          | 381<br>(178-<br>1,614)          | 481<br>(165-<br>1,214)  | 0.99  | 843<br>(313-<br>1,922)  | 576<br>(356-<br>1,296)               | 570<br>(253-<br>1,264)            | 610<br>(164-<br>2,064)          | 765<br>(275-<br>1,519)              | 0.96   |
| <b>cFGF23</b>    | 710<br>(448-<br>1,548)  | 646<br>(307-<br>1,576)              | 505<br>(267-<br>1,269)          | 530<br>(275-<br>1,388)          | 637<br>(279-<br>1,460)  | 0.86  | 704<br>(475-<br>1,204)  | 813<br>(267-<br>1,156)               | 509<br>(294-<br>1,134)            | 524<br>(300-<br>1,078)          | 629<br>(372-<br>1,639)              | 0.93   |
| <b>Ferritin</b>  | 191 (77-<br>237)        | 370<br>(218-<br>475) <sup>1</sup>   | 304<br>(168-<br>413)            | 232<br>(102-<br>355)            | 234 (97-<br>341)        | 0.005 | 198<br>(129-<br>276)    | 327<br>(281-<br>472) <sup>1</sup>    | 365<br>(272-<br>484) <sup>1</sup> | 273<br>(161-<br>369)            | 237<br>(142-<br>285) <sup>4,5</sup> | <0.001 |
| <b>Hepcidin</b>  | 3.4 (2.7-<br>8.8)       | 12.2<br>(7.3-<br>19.2) <sup>1</sup> | 5.3 (3.5-<br>10.7) <sup>2</sup> | 6.8 (3.4-<br>13.5) <sup>3</sup> | -                       | 0.004 | 7.8 (2.7-<br>12.6)      | 21.4<br>(13.9-<br>26.2) <sup>1</sup> | 7.9 (2.9-<br>11.6) <sup>4</sup>   | 6.5 (4.2-<br>10.5) <sup>4</sup> | -                                   | 0.004  |
| <b>Phosphate</b> | 1.29<br>(1.11-<br>1.65) | 1.34<br>(1.08-<br>1.54)             | 1.3<br>(1.15-<br>1.60)          | 1.51<br>(1.21-<br>1.73)         | 1.39<br>(1.15-<br>1.55) | 0.65  | 1.53<br>(1.14-<br>1.71) | 1.37<br>(1.05-<br>1.67)              | 1.43<br>(1.16-<br>1.58)           | 1.37<br>(1.22-<br>1.68)         | 1.56<br>(1.36-<br>1.79)             | 0.64   |

<sup>1</sup>P<0.001 v Day 0; <sup>2</sup>P=0.019 v Day 2; <sup>3</sup>P=0.042 v Day 2; <sup>4</sup>P<0.001 v Day 2; <sup>5</sup>P<0.001 v Day
